Development 138, 3859 (2011) doi:10.1242/dev.072462  
© 2011. Published by The Company of Biologists Ltd

## Concerted involvement of Cdx/Hox genes and Wnt signaling in morphogenesis of the caudal neural tube and cloacal derivatives from the posterior growth zone

**Cesca van de Ven, Monika Bialecka, Roel Neijts, Teddy Young, Jennifer E. Rowland, Emma J. Stringer, Carina van Rooijen, Frits Meijlink, Ana Nóvoa, Jean-Noel Freund, Moises Mallo, Felix Beck and Jacqueline Deschamps**

There was an error in the ePress version of *Development* **138**, 3451-3462 published on 13 July 2011.

The first names of one of the authors were listed incorrectly. The final print and online versions are correct, and the correct author list appears above.

The authors apologise to readers for this mistake.
